1 **Title:** Repurposing brewery contaminant yeast as production strains for low-alcohol beer  
2 fermentation

3 Kristoffer Krogerus<sup>1\*</sup>, Ronja Eerikäinen<sup>1</sup>, Heikki Aisala<sup>1</sup>, Brian Gibson<sup>1#</sup>

4

5 <sup>1</sup> VTT Technical Research Centre of Finland, Tietotie 2, P.O. Box 1000, FI-02044 VTT, Espoo,  
6 Finland

7 # Current address: Technical University of Berlin, Department of Brewing and Beverage  
8 Technology, Seestraße 13, 13355 Berlin, Germany

9 **Keywords:**

10 brewing, non-conventional, low-alcohol, aldehyde

11

12 \*Corresponding author. Tel : +358 40 178 4227 , Email: kristoffer.krogerus@vtt.fi

13

14 **Take Away:**

- 15 - Fungal isolates from brewery microbiota were screened for beer production
- 16 - Numerous maltose-negative strains were tested for low-alcohol beer fermentation
- 17 - *Trigonopsis cantarellii* showed promise compared to a commercial reference strain
- 18 - *T. cantarellii* produced no off-flavours and higher levels of *trans*-geraniol

19

20 **Abstract**

21 A number of fungal isolates were recently obtained from a survey of the microbiota of multiple  
22 breweries and brewery products. Here, we sought to explore whether any of these brewery  
23 contaminants could be repurposed for beneficial use in beer fermentations, with particular focus on  
24 low-alcohol beer. 56 yeast strains were first screened for the utilization of different carbon sources,  
25 ability to ferment brewer's wort, and formation of desirable aroma compounds. A number of strains  
26 appeared maltose-negative and produced desirable aromas without obvious off-flavours. These  
27 were selected for further scaled-up wort fermentations. The selected strains efficiently reduced wort  
28 aldehydes during fermentation, thus eliminating undesirable wort-like off-flavours, and produced a  
29 diverse volatile aroma profile. Sensory analysis of the beer samples using projective mapping  
30 identified two strains, *Trigonopsis cantarellii* and *Candida sojae*, that produced beers similar to a  
31 commercial reference lager beer. 30 L-scale wort fermentations were performed with these two  
32 strains together with a commercial *Saccharomyces ludwigii* reference strain. Both strains  
33 performed comparably to the commercial reference, and the *T. cantarellii* strain in particular,

34 produced low amounts of off-flavours and a significantly higher amount of the desirable  
35 monoterpene alcohol *trans*-geraniol. The strain was also sensitive to common food preservatives  
36 and antifungal compounds, and unable to grow at 37 °C, suggesting it is relatively easily  
37 controllable in the brewery, and appears to have low risk of pathogenicity. This study shows how  
38 the natural brewery microbiota can be exploited as a source of non-conventional yeasts for low-  
39 alcohol beer production.

40

## 41 **Introduction**

42 The global market for low-alcohol and non-alcoholic beer has increased considerably in the past  
43 decade [Statista 2021; Bellut and Arendt 2019]. This increase is driven by numerous factors,  
44 including health consciousness and growth in areas where alcohol consumption is forbidden.  
45 Compared to regular-strength beer, however, low-alcohol beer is typically afflicted with less ‘beer  
46 flavour’ and the presence of undesirable off-flavours. The flavour quality of low-alcohol beer is  
47 very much dependent on the production method, which can be broadly divided into those which are  
48 physical or biological [Brányik, Silva, Baszczyński, Lehnert, and Almeida e Silva 2012]. The  
49 biological methods, where ethanol formation is limited, have gained much interest in the past years  
50 because of their potential for improved flavour quality. Numerous non-conventional yeasts have  
51 successfully been applied for low-alcohol beer production [Bellut, Michel, Zarnkow, Hutzler,  
52 Jacob, Atzler, Hoehnel, Lynch, and Arendt 2019; Johansson et al. 2021; Saerens and Swiegers  
53 2013; Methner, Hutzler, Matoulková, Jacob, and Michel 2019; Capece, De Fusco, Pietrafesa,  
54 Siesto, and Romano 2021]. These yeasts lack the ability to metabolise maltose and maltotriose, the  
55 most abundant sugars in brewer’s wort, yet produce sufficient amounts of the volatile secondary  
56 metabolites characteristic of beer. Alcohol formation is therefore naturally limited to that produced  
57 from the metabolism of the wort monosaccharides. Compared to the *Saccharomyces* yeasts  
58 traditionally used in brewing, many non-conventional yeasts produce higher amounts of desirable  
59 aroma-active compounds [Gutiérrez, Boekhout, Gojkovic, and Katz 2018; Holt, Mukherjee,  
60 Lievens, Verstrepen, and Thevelein 2018; Gamero, Quintilla, Groenewald, Alkema, Boekhout, and  
61 Hazelwood 2016].

62

63 Non-conventional yeasts suitable for brewing have been isolated from a wide range of  
64 environmental niches [Cubillos, Gibson, Grijalva-Vallejos, Krogerus, and Nikulin 2019].  
65 Repurposing of yeasts isolated from fermented food systems, like sourdoughs, kombucha and other  
66 traditional fermented beverages, has been a popular strategy [Johansson et al. 2021; Bellut et al.

67 2018; Tamang, Watanabe, and Holzapfel 2016]. Natural environments, like fruits, tree barks and  
68 insects, have been shown to be a good source of such strains as well [Osburn et al. 2018; Madden,  
69 Epps, Fukami, Irwin, Sheppard, Sorger, and Dunn 2018; Nikulin, Vidgren, Krogerus, Magalhães,  
70 Valkeemäki, Kangas-Heiska, and Gibson 2020; Hutzler, Michel, Kunz, Kuusisto, Magalhães,  
71 Krogerus, and Gibson 2021]. The brewery environment itself offers another potential source for  
72 non-conventional yeasts. Indeed, brewery facilities, ingredients and products are routinely tested for  
73 the presence of contaminant organisms to ensure that product quality and hygiene standards are  
74 maintained. Many yeasts, e.g. *Brettanomyces bruxellensis* and diastatic *Saccharomyces cerevisiae*,  
75 are common contaminants that can seriously influence product quality and lead to product recalls if  
76 unchecked [Tubia, Prasad, Pérez-Lorenzo, Abadín, Zumárraga, Oyanguren, Barbero, Paredes, and  
77 Arana 2018; Krogerus and Gibson 2020]. However, many of the species routinely discovered in  
78 brewery systems are not a serious threat to product quality but are rather indicative of hygiene  
79 levels [Powell and Kerruish 2017]. These benign species are commonly found in traditional  
80 fermentation systems where they are known to contribute to flavour development [Spitaels, Wieme,  
81 Janssens, Aerts, Daniel, Van Landschoot, De Vuyst, and Vandamme 2014]. Examples of such  
82 contaminants include certain *Kluyveromyces* and *Hanseniaspora* species, which are known to  
83 produce floral aromas that are considered positive in beer [Fabre, Blanc, and Goma 1998; Moreira,  
84 Mendes, Hogg, and Vasconcelos 2005], and *Torulaspora delbrueckii*, which produces fruity amyl  
85 alcohols [Canonico, Agarbati, Comitini, and Ciani 2016; Michel, Kopecká, Meier-Dörnberg,  
86 Zarnkow, Jacob, and Hutzler 2016].

87

88 A recent survey of the microbiota in multiple breweries yielded a large collection of fungal isolates  
89 [Sohlberg, Sarlin, and Juvonen 2021]. While a broad microbiota may typically be seen as a negative  
90 in an industrial brewery, we wanted to turn this into a positive. The aim was to first use high-  
91 throughput screening to identify maltose-negative strains suitable for low-alcohol brewing. A subset  
92 of isolates was further screened in small-scale and 2 L-scale wort fermentations, after which  
93 chemical and qualitative sensory analysis was performed on the resulting beers. Following this  
94 screening, two candidate strains were selected for scaled-up wort fermentations and descriptive  
95 sensory analysis. The present study highlights how the natural brewery microbiota can be exploited  
96 for low-alcohol beer production.

97

## 98 **Materials & Methods**

### 99 *Yeast strains*

100 A list of all non-conventional yeast strains included in this study is found in Supplementary Table  
101 S1. In addition, the following three strains from VTT's culture collection  
102 (<http://culturecollection.vtt.fi>) were included as commercial references: *Saccharomyces cerevisiae*  
103 VTT-A75060, *Saccharomyces pastorianus* VTT-A63015, and *Saccharomycodes ludwigii* VTT-  
104 C181010.

105

#### 106 Microplate cultivations

107 Growth on various carbon sources and in the presence of 100 mg/L hop-derived iso-alpha acids was  
108 tested in microplate cultivations. The microcultures were carried out in 100-well honeycomb  
109 microtiter plates at 25 °C (with continuous shaking), and their growth dynamics were monitored  
110 with a Bioscreen C MBR incubator and plate reader (Oy Growth Curves Ab, Finland). The wells of  
111 the microtiter plates were filled with 300 µL of defined medium (0.67% yeast nitrogen base without  
112 amino acids, 1% carbon source). Precultures of the strains were started in 20 mL YPD medium (1%  
113 yeast extract, 2% peptone, 2% glucose) and incubated at 25 °C with shaking at 120 rpm overnight.  
114 The optical density at 600 nm was measured, and precultures were washed and resuspended to an  
115 OD<sub>600</sub> value of 3. The microcultures were started by inoculating the microtiter plates with 10 µL of  
116 cell suspension per well (for an initial OD<sub>600</sub> value of 0.1) and placing the plates in the Bioscreen  
117 C MBR. The optical density of the microcultures at 600 nm was automatically read every 30 min.  
118 Four replicates were performed for each strain in each medium. Growth curves for the  
119 microcultures were modelled based on the OD<sub>600</sub> values over time using the 'GrowthCurver'-  
120 package for R.

121

122 The ability to produce phenolic off-flavour was estimated using the absorbance-based method  
123 described by Mertens et al. (2017).

124

#### 125 Wort fermentations

126 Small-scale fermentations were carried out in 100 mL Schott bottles capped with glycerol-filled  
127 airlocks. Yeast strains were grown overnight in 25 mL YPD medium at 25 °C. The pre-cultured  
128 yeast was then inoculated into 80 mL of all-malt wort (extract ranged from 5 to 10 °Plato) at a rate  
129 of 1 to 2.5 g fresh yeast L<sup>-1</sup> (depending on °Plato of wort). Fermentations were carried out in  
130 duplicate at 25 °C for 7 days. Fermentations were monitored by mass lost as CO<sub>2</sub>.

131

132 2 L-scale fermentations were carried out in 3 L cylindroconical stainless steel fermenting vessels  
133 containing 2 L of 5 °P wort. Yeast was propagated in autoclaved wort. The 5 °P wort (23.3 g  
134 maltose, 6.3 g maltotriose, 5.8 g glucose, and 1.6 g fructose per litre) was produced at the VTT Pilot  
135 Brewery from barley malt. The wort was oxygenated to 10 mg L<sup>-1</sup> prior to pitching (Oxygen  
136 Indicator Model 26073 and Sensor 21158; Orbisphere Laboratories, Switzerland). Yeast was  
137 inoculated at a rate of 1 g fresh yeast L<sup>-1</sup>. The fermentations were carried out in duplicate at 25 °C  
138 for 7 days.

139

140 30L-scale fermentations were carried out in 40 L stainless steel tanks containing 30 L of 7.5 °P  
141 wort. The 7.5 °P wort (36.3 g maltose, 10.1 g maltotriose, 9.7 g glucose, and 2.4 g fructose per litre)  
142 was produced at the VTT Pilot Brewery from barley malt. Yeast was propagated and inoculated as  
143 above. Fermentations were carried out for 7 days, after which the beer was collected in sterilized  
144 kegs for maturation. Green beers were matured at 10 °C for five days before five days' stabilization  
145 at 0 °C, after which time the beers were depth filtered (Seitz EK filter sheets with a relative  
146 retention of <1.0 µm, Pall Corporation, USA), carbonated to 5 g/l of CO<sub>2</sub> and bottled. The bottled  
147 beer was further pasteurized at 60 °C for 30 minutes.

148

#### 149 Chemical analysis

150 The alcohol content of the final beer was measured with an Anton Paar density meter DMA 5000 M  
151 with AlcoLyzer beer ME and pH ME modules (Anton Paar GmbH, Austria).

152

153 Volatile aroma compounds were analysed using headspace solid phase micro-extraction coupled  
154 with gas chromatography (Agilent 7890A) - mass spectrometry (Agilent 5975C; HS-SPME-GC-  
155 MS) by modifying the method used by Rodriguez-Bencomo et al. [Rodriguez-Bencomo, Muñoz-  
156 González, Martín-Álvarez, Lázaro, Mancebo, Castañé, and Pozo-Bayón 2012]. 6 mL of beer  
157 sample, 1.8 g of NaCl, and 50 µL of internal standard solution (containing 1.28 µg 3-octanol, 1.19  
158 µg 3,4-dimethylphenol) were added to 20 mL headspace vials. The samples were pre-incubated in  
159 Gerstel MPS autosampler at 44.8 °C for 10 min and the volatiles were extracted by using a 2 cm  
160 divinylbenzene/ carboxen/polydimethylsiloxane (DVB/CAR/PDMS) fibre (Supelco) at 44.8 °C for  
161 46.8 min. The samples were injected in splitless mode (10 min desorption time at 270 °C) and the  
162 compounds were separated on an HP-Innowax silica capillary column (60 m, 0.250 mm i.d., 0.25  
163 µm film thickness). The oven temperature program was from 40 °C (3 min) to 240 °C  
164 (4 °C min<sup>-1</sup>) and the final temperature was held for 15 min. The MS data were collected at a

165 mass range of 35-450 amu. Identification was based on spectral data of reference compounds and  
166 those of NIST 08 library. Calibration curves determined for 2-methoxy-4-vinylphenol, 2-  
167 phenylethyl acetate,  $\alpha$ -terpineol,  $\beta$ -citronellol, *cis*-geraniol, *trans*-geraniol, isopentyl acetate,  
168 linalool, and ethyl esters of acetic, butyric, decanoic, hexanoic and octanoic acids, respectively ( $r^2$   
169 = 0.933-0.999). Other compounds were quantified by using internal standards (3-octanol or 3,4-  
170 dimethylphenol).

171

172 Aldehydes were analysed as oximes by using a headspace sampler (Agilent 7697A) coupled with  
173 gas chromatograph (Agilent 7890B) and compounds were detected using a Micro Electron Capture  
174 Detector (HS-GC-ECD). Carbonyl compound standards were 2-methylpropanal, 2-methylbutanal,  
175 3-methylbutanal, hexanal, furfural, methional, phenylacetaldehyde, and (*E*)-2-nonenal (Aldrich,  
176 Finland). A stock solution containing a mixture of the standard compounds in ethanol was prepared  
177 at 1000  $\mu\text{g L}^{-1}$  each. The calibration range was 0.5–40  $\mu\text{g L}^{-1}$  and dilutions were prepared in  
178 5% ethanol. The sum of the peak areas of the two geometrical isomers (*E* and *Z*) was used for  
179 calculations. An aqueous solution of derivatization agent O-(2,3,4,5,6-pentafluorobenzyl)-  
180 hydroxylamine (PFBOA) (Sigma-Aldrich) was prepared at a concentration of 6 g/L. One hundred  
181 microliters of this solution and 5 mL of deionized water or beer were placed in a 20 mL glass vial  
182 and sealed with a crimp cap (Agilent). The sample/standard vial was then placed in the headspace  
183 sampler with following conditions: sample equilibrium in oven for 30 min at 60 °C, after which  
184 1 min of injection of sample fill pressurized at 25 psi. Loop temperature was 100 °C and transfer  
185 line was held at 110 °C. The following GC conditions were applied: HP-5 capillary column,  
186 50 m  $\times$  0.32 mm  $\times$  1.05  $\mu\text{m}$  (J&W Scientific, Folsom, CA). Helium was the carrier gas at a  
187 flow rate of 1.0 mL/min and for ECD, nitrogen make up gas was applied at a flow rate of  
188 30 mL/min. The front inlet temperature was 250 °C. The injection was in the split mode and the  
189 split ratio 10:1 was applied. The oven temperature program used was 40 °C for 2 min, followed  
190 by an increase of 10 °C  $\text{min}^{-1}$  to 140 °C (held 5 min) and 7 °C  $\text{min}^{-1}$  to 250 °C. The final  
191 temperature was held for 3 min.

192

193 Diacetyl, dimethyl sulphide, higher alcohol and ester concentrations in the beers produced at 30L-  
194 scale were analysed at Campden BRI (UK).

195

196 Sensory analysis

197 Projective Mapping with Ultra Flash profiling was conducted for the beers based on established  
198 methods [Risvik, McEwan, Colwill, Rogers, and Lyon 1994; Perrin and Pagès 2009; Aisala,  
199 Laaksonen, Manninen, Raittola, Hopia, and Sandell 2018] and carried out in an ISO-8589 sensory  
200 evaluation laboratory at VTT. A total of 10 selected and trained assessors participated in the  
201 evaluation. Written informed consents were obtained from the participants prior to the evaluation. A  
202 commercial beer sample was included in the samples twice (second time as a blind duplicate) for a  
203 total number of 9 samples. The samples were served in black beer glasses covered in lids, marked  
204 with 3-digit codes and served in random order. The evaluation was done in two parts: the first  
205 Projective mapping based on odour properties and the second one based on taste and flavour  
206 properties. An A3 size paper was used for placing the samples. The assessors were asked to first  
207 smell or taste the samples and make notes on the provided A4 paper with instructions. Then they  
208 were asked to physically place the samples on the A3 evaluation paper so that the similarity of the  
209 samples was reflected in their distances. After the assessor was ready with the placement, they were  
210 asked to mark the locations of the samples with the 3-digit code, mark possible groups, and write  
211 descriptive terms next to the samples or sample groups. The filled papers were scanned, and the  
212 coordinates of each sample were measured digitally using the ImageJ software [Schneider,  
213 Rasband, and Eliceiri 2012]. The descriptive terms were collected into a contingency table. The  
214 resulting dataset was analysed with Multiple Factor Analysis (MFA) using R and the ‘SensMineR’  
215 package [Le and Husson 2008].

216

217 The descriptive profiling of the three beer samples was conducted by nine trained assessors in the  
218 same sensory evaluation laboratory as above. The base attribute list was developed by four trained  
219 assessors in a consensus session. After that, the whole panel was trained in two groups where they  
220 refined this base sensory lexicon, discussed the intensity ranges of the samples, and decided on  
221 reference samples for the intensities. The final sensory profile had 6 odour attributes, 4 taste and  
222 flavour attributes and 2 mouthfeel attributes. The samples (50 mL) were served in black beer  
223 glasses with 3-digit codes and the serving order was randomized with a Latin squares design. The  
224 attribute intensities were evaluated with a 0–10 continuous line scale that was anchored with 0 =  
225 attribute non-perceivable, and 10 = attribute perceived as very intense. The data were collected with  
226 Compusense five 5.6 (Compusense Inc., Guelph, ON, Canada). Water was used as the palate  
227 cleanser and the assessors were instructed to spit the sample out after tasting. The descriptive  
228 sensory data was analysed with a two-way mixed model analysis of variance with samples as the



229 fixed factor and the assessors as a random factor using SPSS version 26 (IBM Corp, Armonk, NY,  
230 USA). Tukey's HSD was used as the post hoc test.

231

### 232 Assessment of process and health safety

233 The tolerance to common food preservatives was tested in microplate cultivations using the  
234 BioScreen C incubator similarly as described above. Cultivations were carried out in 150 µl of YPD  
235 (1% glucose w/v) supplemented with 5% ethanol, 150 mg/L sodium benzoate (Sigma-Aldrich,  
236 Darmstadt, Germany), 250 mg/L potassium sorbate (Sigma-Aldrich, Darmstadt, Germany), or  
237 200 mg/L potassium metabisulfite (Brown, Poland). All media were adjusted to pH 4 with HCl.

238

239 Biofilm formation was assessed by crystal violet staining of microplate cultures in 96-well plates  
240 [Shukla and Rao 2017]. Wells were filled with 250 µL of 10 °Plato wort, and inoculated with 2.5  
241 µL of overnight culture in five replicates. Plates were statically incubated for five days at 20 °C.  
242 The yeast cultures were removed by pipetting, and the plate was rinsed with sterile deionized water.  
243 300 µL of 0.1 % crystal violet solution was placed in the wells for five minutes, after which the  
244 plate was rinsed three times with sterile deionized water. The plate was left to air-dry for 15 minutes  
245 in a laminar flow cabinet. The remaining crystal violet, which was still bound to the cells, was  
246 dissolved with 300 µl of 95 % ethanol. Absorbances of the wells were measured at 595 nm with a  
247 Multiskan EX plate reader (Labsystems Oy, Finland). The plate was left overnight at 4 °C and  
248 absorbance was re-measured.

249

250 Tolerance to nine antifungal compounds was tested using Sensititre YeastOne YO10 plates  
251 (Thermo Scientific, Finland) using kit instructions. Concentrations of biogenic amines in beers was  
252 measured at Campden BRI (UK).

253

### 254 Whole-genome sequencing

255 The whole-genome of *Trigonopsis cantarellii* P-69 was sequenced at NovoGene (UK). DNA was  
256 extracted using the method described by Denis et al. [2018]. Sequencing was carried out on a  
257 NovaSeq 6000 instrument (Illumina). The 150 bp paired-end reads have been submitted to NCBI-  
258 SRA under BioProject number PRJNA748016. Reads were trimmed and filtered with fastp using  
259 default settings (version 0.20.1; [Chen, Zhou, Chen, and Gu 2018]). Trimmed reads were assembled  
260 with SPAdes (version 3.10.1; [Bankevich et al. 2012]). The resulting assembly was filtered using  
261 CVLFilter (using minimum length of 500 and minimum coverage of 10) to remove low-coverage



262 contigs resulting from potential contaminating DNA [Douglass, O'Brien, Offei, Coughlan, Ortiz-  
263 Merino, Butler, Byrne, and Wolfe 2019]. BUSCO (Benchmarking Universal Single-Copy  
264 Orthologs; version 3.0.2; using the saccharomycetales\_odb9 dataset) was used to assess the gene set  
265 completeness of the assembly [Waterhouse, Seppey, Simão, Manni, Ioannidis, Klioutchnikov,  
266 Kriventseva, and Zdobnov 2018].

267

268 The *T. cantarellii* P-69 assembly was compared to the assemblies of other closely related species  
269 obtained from NCBI-Assembly under BioProject PRJNA429441 [Shen et al. 2018]. A multiple  
270 sequence alignment of BUSCO genes was performed as described in [Steenwyk, Shen, Lind,  
271 Goldman, and Rokas 2019]. In brief, the amino acid sequence of orthologous single-copy BUSCO  
272 genes with >50% taxon occupancy were extracted (using genomic\_BUSCOs2uscofa.py from  
273 [https://github.com/JLSteenwyk/Phylogenetic\\_scripts](https://github.com/JLSteenwyk/Phylogenetic_scripts)) and aligned with MAFFT (version 7.407;  
274 [Katoh and Standley 2013]). The alignments were trimmed with trimal (version 1.4.rev15;  
275 [Capella-Gutierrez, Silla-Martinez, and Gabaldon 2009]), and a maximum likelihood phylogenetic  
276 tree was constructed using IQ-TREE (version 1.5.5; [Nguyen, Schmidt, Von Haeseler, and Minh  
277 2015]) with the JTT+I+G4 model and 1000 bootstrap replicates [Minh, Nguyen, and Von Haeseler  
278 2013]. In addition, a neighbour-joining tree based on MinHash distances [Ondov, Treangen,  
279 Melsted, Mallonee, Bergman, Koren, and Phillippy 2016] was generated using mashtree [Katz,  
280 Griswold, Morrison, Caravas, Zhang, Bakker, Deng, and Carleton 2019]

281

## 282 **Results and Discussion**

### 283 *Phenotypic screening of fungal brewery isolates for brewing-relevant traits*

284 A total of 56 yeast strains, previously isolated from industrial brewery environments [Sohlberg,  
285 Sarlin, and Juvonen 2021], were screened for various brewing-relevant phenotypes. Among the  
286 strains were 18 different species from 10 genera, and the isolation environments included brewery  
287 air, brewery surfaces, raw materials, and spoiled products. A *Saccharomyces cerevisiae* ale strain,  
288 *Saccharomyces pastorianus* lager strain, and *Saccharomycodes ludwigii* low-alcohol strain were  
289 included as references. First, their growth on various carbon sources (glucose, fructose, maltose,  
290 and maltotriose) was measured in microplate cultivations (Figure 1A). The strains could be broadly  
291 grouped into three groups: those capable of growing on both maltose and maltotriose, those only on  
292 maltose, and those on neither. For full-strength beer fermentation, a yeast strain must be capable of  
293 utilizing at least maltose (constituting approx. 60% of the fermentable wort sugars), and preferably  
294 maltotriose as well (constituting approx. 20% of the fermentable wort sugars). Maltose-negative

295 strains, on the other hand, have shown promise for low-alcohol beer fermentations [Johansson et al.  
296 2021; Bellut et al. 2019]. In addition, growth in the presence of 100 mg/L hop-derived iso-alpha  
297 acids was tested, and no inhibition was observed for any of the strains (data not shown).

298

299 Small-scale anaerobic wort fermentations were also carried out with all the strains to confirm the  
300 results observed during the microplate cultivations, and to test which strains produce pleasant  
301 aromas. Again, the strains grouped into three main groups: those producing approx. >4% ABV,  
302 approx. 1% ABV, and those showing negligible alcohol formation (Figure 1B). Expectedly,  
303 *Saccharomyces* yeasts performed well in wort and grouped into the first group. The third group  
304 consisted of multiple strains showing no signs of fermentation in wort. Interestingly, however, a pH  
305 decrease was observed for five strains, indicating metabolic activity despite no ethanol formation.

306

307 The fermented worts were also subjected to a ‘sniff’ test, to identify strains producing pleasant or  
308 clearly undesirable aromas (Figure 1C). Undesirable solvent-like aromas were detected in a large  
309 number of strains, particularly among *Wickerhamomyces anomalus* isolates. Undesirable wort-like  
310 aromas were also detected for many strains, mainly those performing poorly during wort  
311 fermentations. Desirable fruity aromas were observed mainly among the *Saccharomyces* strains,  
312 however, they were frequently coupled with undesirable phenolic aromas. The ability to  
313 decarboxylate ferulic acid to 4-vinylguaiacol (i.e. phenolic off-flavour formation) was therefore  
314 tested for all strains (Figure 1D), and found in approx. 45%. Out of the 56 strains that were  
315 screened, nine had a pleasant aroma lacking any obvious off-flavours (e.g. phenolic, solvent-like, or  
316 wort-like). These included strains of *Candida pararugosa*, *Candida sojae*, *Kregervanrija delftensis*,  
317 *Pichia manshurica*, *S. cerevisiae*, *Trigonopsis cantarellii*, *Trigonopsis variabilis*, and  
318 *Zygosaccharomyces rouxii*. As the majority of these were maltose-negative, we next explored  
319 whether they could be used for low-alcohol beer fermentation.

320

### 321 Identifying strains suitable for low-alcohol beer fermentations

322 Seven brewery isolates (Table 1), as well as a commercial *S. ludwigii* reference strain, were selected  
323 for further trials following the initial pre-screening. 80 mL-scale wort fermentations were first  
324 performed. With the exception of those fermented with the *W. anomalus* isolate P-2.4, the alcohol  
325 content of the beers remained below 0.70% alcohol by volume (Table 1). pH values of the beers  
326 ranged from 4.4 to 5.1 (dropping from 5.3 in the wort), with the highest values measured in the beer  
327 fermented with the *S. ludwigii* reference strain. A beer pH value below 5 is typically recommended

328 for microbiological safety reasons [Menz, Aldred, and Vriesekoop 2011]. The main contributors to  
329 the wort-like flavour of unfermented wort, a flavour that is considered undesirable in beer, are a  
330 number of unbranched and branched-chain aldehydes. Hence, we measured the concentration of six  
331 key aldehydes in the beers. The wort aldehydes were efficiently reduced by all strains (Figure 2A),  
332 and were in many cases below the levels measured in a commercial full-strength lager beer (dashed  
333 line). Methional, in particular, with its low flavour threshold of 5 µg/L, is considered one of the  
334 main causes of wort-like flavour [Gernat, Brouwer, and Ottens 2020]. Here, the majority of the  
335 strains reached concentrations below the flavour threshold. Volatile aroma compounds in the beers  
336 were also measured with HS-SPME-GC/MS. The aroma profiles could be broadly divided into four  
337 groups (Figure 2B), with the wort and the beer fermented with *W. anomalus* P-2.4 forming two  
338 outliers. The wort sample was expectedly characterized by aldehydes, while the *W. anomalus* beer  
339 was characterized by the highest concentrations of volatile esters (Figure 2C). *Meyerozyma*  
340 *caribbica* T-31 and *Candida sojae* T-39 clustered together with the *S. ludwigii* reference strain,  
341 while the other strains clustered intermediate between the three other groups.

342

343 Based on these results, five brewery isolates (*C. sojae*, *K. delftensis*, *T. cantarellii*, *T. variabilis*, and  
344 *W. anomalus*) and the *S. ludwigii* reference strain were selected for 2 L-scale wort fermentations  
345 and subsequent sensory analysis. The alcohol content of the beers ranged from 0.0% to 0.6%  
346 alcohol by volume after one week of fermentation, while beer pH again ranged from 4.5 to 5.1  
347 (Table 2). The beer was collected for sensory analysis, which was carried out by ten trained  
348 participants at VTT's sensory lab. We wanted to identify what beers were most similar to a  
349 commercial full-strength lager beer, and for that sensory analysis was performed using Projective  
350 Mapping with Ultra Flash Profiling [Risvik, McEwan, Colwill, Rogers, and Lyon 1994; Perrin and  
351 Pagès 2009]. Here, the six experimental beer samples, along with two duplicate commercial lager  
352 beers and a wort sample, were assessed based on odour and flavour. The results were analysed with  
353 multiple factor analysis (MFA), and they revealed that the experimental beers were mostly similar,  
354 and tended to group between the wort sample and the commercial beer (Figure 3A). The *W.*  
355 *anomalus* beer was again a clear outlier, as the odour and flavour were dominated by solvent-like  
356 tones. Based on flavour, the beers fermented with *T. cantarellii* and the *S. ludwigii* reference strain  
357 were scored closest to the commercial full-strength lager (Figure 3B). Some common odour and  
358 flavour descriptors for these two strains and *C. sojae* were 'mild', 'fruity', and 'sweet' (data not  
359 shown). On the other hand, *T. variabilis*, *K. delftensis* as well as *S. ludwigii* were described as

360 ‘worty’. Based on the fermentation and sensory results, *T. cantarellii* and *C. sojae* were chosen for  
361 pilot-scale fermentations.

362

### 363 Pilot-scale low-alcohol wort fermentations with selected strains

364 30 L-scale wort fermentations were carried out with brewery isolates *T. cantarellii* and *C. sojae*.  
365 *S. ludwigii* was again included as a reference strain. Fermentations progressed similarly to previous  
366 smaller-scale fermentations, with the beers reaching alcohol levels of 0.29%, 0.48%, and 0.68%  
367 alcohol by volume, respectively, after one week (Figure 4A). pH values in all three beers were  
368 identical (4.8). Fermentation progressed the fastest by *S. ludwigii*. Following fermentation, samples  
369 were drawn for chemical analysis, after which beers were carbonated and bottled for sensory  
370 analysis.

371

372 A number of yeast-derived aroma-active esters play a central role in the aroma of beer [Pires,  
373 Teixeira, Brányik, and Vicente 2014], however, the concentration of these is typically low in beer  
374 fermented with maltose-negative yeast from reduced metabolism [Bellut and Arendt 2019]. Here,  
375 the beers also showed low amounts of esters and higher alcohols, with values in many cases being  
376 below detection limits (Table 3). The highest concentrations were measured in the beer produced  
377 with the *S. ludwigii* reference strain. HS-SPME-GC/MS analysis was used to measure other volatile  
378 aroma compounds as well. Differences in monoterpene alcohol concentrations were observed in the  
379 beers. Levels of the hop-derived linalool were equal in all beers, however, *trans*-geraniol and *cis*-  
380 geraniol levels were significantly higher in the *C. sojae* beer, while *trans*-geraniol levels were  
381 significantly higher in the *T. cantarellii* beer (Figure 4B-D). These monoterpenes contribute floral  
382 and citrus-like aroma to the beer. *cis*-geraniol levels were below reported flavour thresholds (80  
383 µg/L; [Takoi, Itoga, Koie, Kosugi, Shimase, Katayama, Nakayama, and Watari 2010]), but sub-  
384 threshold concentrations may nevertheless contribute positively to the beer aroma through  
385 synergistic effects with other monoterpenes [Dietz, Cook, Huisman, Wilson, and Ford 2020]. The  
386 varying concentrations of monoterpene alcohols in the beers suggests potential biotransformation of  
387 hop-derived monoterpene alcohols [Serra Colomer, Funch, Solodovnikova, Hobley, and Förster  
388 2020].

389

390 In regards to off-flavours, aldehyde levels in all beers again decreased from those measured in the  
391 wort (Figure 4G-H). Lowest aldehyde levels were measured in the beer fermented with *T.*  
392 *cantarellii*. Beers fermented with *S. ludwigii* tended to have higher levels of branched-chain

393 aldehydes. Methional concentrations again decreased substantially in the beers compared to the  
394 levels in the wort. In addition to the aldehydes, concentrations of both diacetyl and dimethyl  
395 sulphide close to their respective flavour thresholds were observed in the *C. sojae* beers (Figure 4E-  
396 F). Diacetyl, with a butter-like aroma, is a common off-flavour in beer [Krogerus and Gibson 2013].  
397 It is both indirectly generated by and reduced by the yeast during fermentation, and high beer  
398 concentrations are typically indicative of a too short fermentation time. Dimethyl sulphide, with a  
399 ‘cooked corn’ aroma, is considered undesirable at concentrations above 100 µg/L [Anness and  
400 Bamforth 1982]. Concentrations of these two off-flavours were considerably below the flavour  
401 threshold in the other two beers.

402

403 The bottled beers were subjected to sensory analysis at VTT’s sensory lab. Nine trained participants  
404 performed descriptive profiling of 12 attributes, and a commercial non-alcoholic lager beer was  
405 included as a reference. The three experimental and one reference beer scored similarly across the  
406 12 attributes (Figure 5). Statistically significant differences were observed only for sweetness,  
407 which divided the samples into two groups: the more intense sweetness  
408 of *T. cantarellii* and *C. sojae* beers, while the reference beer and *S. ludwigii* beers were less sweet.  
409 Of the experimental beers, the one fermented with the commercial *S. ludwigii* strain scored lowest  
410 in fruitiness, possibly from the lower concentrations of monoterpene alcohols. As already revealed  
411 during chemical analysis, diacetyl notes were also detected by the panel in the *C. sojae* beer. The  
412 other beers were free of obvious off-flavours. Based on the pilot-scale fermentations, along with  
413 subsequent sensory and chemical analysis, *T. cantarellii* appears to be a promising candidate for  
414 low-alcohol beer fermentation.

415

#### 416 Process and hygiene control

417 As many non-conventional yeasts have not been used in food or beverage production before, it is  
418 vital that they are safe to use from both a health and process hygiene perspective. Particularly, since  
419 the yeasts studied here were already isolated from the brewery environment. To assess process  
420 safety, the tolerance of *T. cantarellii* and *C. sojae* to common food preservatives [Kregiel 2015], as  
421 well as potential for biofilm formation, was tested (Figure 6). Modern breweries often also produce  
422 non-beer beverages in the same facilities, which increases the need for controlling potential cross-  
423 contaminations. *T. cantarellii* was inhibited by all of the tested preservatives, while *C. sojae* was  
424 able to grow in the presence of 150 mg/L benzoate and 200 mg/L sulphite (Figure 6A and B).  
425 Biofilm potential was estimated using crystal violet staining of washed microculture plates, and *T.*

426 *cantarellii* produced significantly less biofilm than the *S. pastorianus* A-63015 control (Figure 6C).  
427 *C. sojae*, on the other hand, produced significantly more biofilm than the control. Hence, *T.*  
428 *cantarellii* appears to be relatively easy to control from a process hygiene perspective, as it can be  
429 controlled using typical food preservatives in non-beer beverages, and shows little biofilm potential.

430

431 To assess the potential health risks associated with the *T. cantarellii* and *C. sojae* isolates, a series  
432 of tests were carried out. First, the tolerance of the *T. cantarellii* and *C. sojae* isolates to nine  
433 antifungals was tested, to ensure that any emerging infection would be treatable. *C. sojae* was  
434 sensitive to all of the tested antifungals, while *T. cantarellii* was only able to grow in the presence  
435 of 5-fluorocytosine at the tested concentrations (MIC values in Table 4). Neither of the strains were  
436 able to grow at 37 °C (i.e. body temperature), suggesting a low potential for pathogenicity.  
437 Furthermore, the strains only produced trace levels of biogenic amines, and concentrations  
438 remained below those found in commercial beer [Poveda 2019]. Both isolates therefore appear to be  
439 relatively safe from a health perspective, however, the strains should be thoroughly tested before  
440 industrial use. *T. cantarellii* is also considered a safe yeast for beneficial use according to  
441 Bourdichon et al. [Bourdichon et al. 2012].

442

443 As *T. cantarellii* showed particular promise for low-alcohol beer production, whole-genome  
444 sequencing was finally used to confirm the identification of the strain. The paired-end sequencing  
445 reads were *de novo* assembled using SPAdes (assembly statistics available in Table 5). As no  
446 sequencing data for other *T. cantarellii* strains was found in public databases, the *T. cantarellii*  
447 assembly was compared to assemblies of other closely related species [Shen et al. 2018]. These  
448 included *Trigonopsis variabilis*, *Trigonopsis vinaria*, *Sugiyamaella lignohabitans*, *Tortispora*  
449 *ganteri*, and *Botryozyma nematodophila*. The assembly of *T. cantarellii* P-69 grouped close to  
450 *Trigonopsis variabilis*, *Trigonopsis vinaria* and *Sugiyamaella lignohabitans*, in both a maximum  
451 likelihood phylogenetic tree generated based on an alignment of 996 BUSCO genes (Figure 7A),  
452 and in a neighbour-joining tree computed based on MinHash (Mash) distances in the assemblies  
453 (Figure 7B).

454

## 455 **Conclusions**

456 In this study we aimed to repurpose and exploit fungal isolates from the natural brewery microbiota  
457 for low-alcohol beer production. A number of promising strains for low-alcohol beer fermentation  
458 were identified following pre-screening, and two strains were ultimately selected for 30L-scale wort



459 fermentations and descriptive sensory analysis. The two selected strains, *Trigonopsis cantarellii* P-  
460 69 and *Candida sojae* T-39, performed comparably to a commercial *Saccharomyces ludwigii*  
461 reference strain. The *T. cantarellii* strain in particular, produced low amounts of off-flavours and a  
462 significantly higher amount of the desirable monoterpene alcohol *trans*-geraniol. The mechanisms  
463 and potential for monoterpene biotransformation should be studied in more detail in the future. The  
464 strain also appears to be easily controllable by common food preservatives in the brewery, and  
465 appears to have low risk of pathogenicity.

466

#### 467 **Acknowledgements**

468 We thank Aila Siltala, Niklas Fred, Eero Mattila for technical assistance, Atte Mikkelsen and Liisa  
469 Änäkäinen for the aldehyde analysis, Tuulikki Seppänen-Laakso and Matti Hölttä for the aroma  
470 analysis, and Jarkko Nikulin for assistance during sensory analysis. We thank PBL Brewing  
471 Laboratory (Oy Panimolaboratorio - Bryggerilaboratorium Ab) and Business Finland for funding  
472 the study.

473

#### 474 **Conflict of Interest Statement**

475 All authors were employed by VTT Technical Research Centre of Finland. The funders had no role  
476 in study design, data collection and analysis, decision to publish, or preparation of the manuscript.

477

#### 478 **References**

- 479 Aisala H, Laaksonen O, Manninen H, Raittola A, Hopia A, Sandell M. 2018. Sensory properties of  
480 Nordic edible mushrooms. *Food Res. Int.*, **109**: 526–536.  
481 <https://linkinghub.elsevier.com/retrieve/pii/S0963996918303430>.
- 482 Anness BJ, Bamforth CW. 1982. DIMETHYL SULPHIDE-A REVIEW. *J. Inst. Brew.*, **88**: 244–  
483 252. <http://doi.wiley.com/10.1002/j.2050-0416.1982.tb04101.x>.
- 484 Bankevich A et al. 2012. SPAdes: A New Genome Assembly Algorithm and Its Applications to  
485 Single-Cell Sequencing. *J. Comput. Biol.*, **19**: 455–477.  
486 <http://www.liebertpub.com/doi/10.1089/cmb.2012.0021>.
- 487 Bellut K et al. 2018. Application of Non-Saccharomyces Yeasts Isolated from Kombucha in the  
488 Production of Alcohol-Free Beer. *Fermentation*, **4**: 66. [http://www.mdpi.com/2311-](http://www.mdpi.com/2311-5637/4/3/66)  
489 [5637/4/3/66](http://www.mdpi.com/2311-5637/4/3/66).
- 490 Bellut K, Arendt EK. 2019. Chance and Challenge: Non-Saccharomyces yeasts in nonalcoholic and  
491 low alcohol beer brewing: A Review. *J. Am. Soc. Brew. Chem.*, **77**: 77–91.



- 492 Bellut K, Michel M, Zarnkow M, Hutzler M, Jacob F, Atzler JJ, Hoehnel A, Lynch KM, Arendt  
493 EK. 2019. Screening and Application of Cyberlindnera Yeasts to Produce a Fruity, Non-  
494 Alcoholic Beer. *Fermentation*, **5**: 103. <https://www.mdpi.com/2311-5637/5/4/103>.
- 495 Bourdichon F et al. 2012. Food fermentations: Microorganisms with technological beneficial use.  
496 *Int. J. Food Microbiol.*, **154**: 87–97.  
497 <https://linkinghub.elsevier.com/retrieve/pii/S0168160511007586>.
- 498 Brányik T, Silva DP, Baszczyński M, Lehnert R, Almeida e Silva JB. 2012. A review of methods of  
499 low alcohol and alcohol-free beer production. *J. Food Eng.*, **108**: 493–506.  
500 <https://linkinghub.elsevier.com/retrieve/pii/S0260877411005140>.
- 501 Canonico L, Agarbati A, Comitini F, Ciani M. 2016. *Torulaspota delbrueckii* in the brewing  
502 process: A new approach to enhance bioflavour and to reduce ethanol content. *Food*  
503 *Microbiol.*, **56**: 45–51. <https://linkinghub.elsevier.com/retrieve/pii/S0740002015002609>.
- 504 Capece A, De Fusco D, Pietrafesa R, Siesto G, Romano P. 2021. Performance of Wild Non-  
505 Conventional Yeasts in Fermentation of Wort Based on Different Malt Extracts to Select  
506 Novel Starters for Low-Alcohol Beers. *Appl. Sci.*, **11**: 801. <https://www.mdpi.com/2076-3417/11/2/801>.
- 508 Capella-Gutierrez S, Silla-Martinez JM, Gabaldon T. 2009. trimAl: a tool for automated alignment  
509 trimming in large-scale phylogenetic analyses. *Bioinformatics*, **25**: 1972–1973.  
510 <https://academic.oup.com/bioinformatics/article-lookup/doi/10.1093/bioinformatics/btp348>.
- 511 Chen S, Zhou Y, Chen Y, Gu J. 2018. fastp: an ultra-fast all-in-one FASTQ preprocessor.  
512 *Bioinformatics*, **34**: i884–i890.  
513 <https://academic.oup.com/bioinformatics/article/34/17/i884/5093234>.
- 514 Cubillos FA, Gibson B, Grijalva Vallejos N, Krogerus K, Nikulin J. 2019. Bioprospecting for  
515 brewers: Exploiting natural diversity for naturally diverse beers. *Yeast*, **36**: 383–398.  
516 <https://onlinelibrary.wiley.com/doi/abs/10.1002/yea.3380>.
- 517 Denis E, Sanchez S, Mairey B, Beluche O, Cruaud C, Lemainque A, Wincker P, Barbe V. 2018.  
518 Extracting high molecular weight genomic DNA from *Saccharomyces cerevisiae*. *Protoc.*  
519 *Exch.* <http://www.nature.com/protocolexchange/protocols/6877>.
- 520 Dietz C, Cook D, Huisman M, Wilson C, Ford R. 2020. The multisensory perception of hop  
521 essential oil: a review. *J. Inst. Brew.*, **126**: 320–342.
- 522 Douglass AP, O’Brien CE, Offei B, Coughlan AY, Ortiz-Merino RA, Butler G, Byrne KP, Wolfe  
523 KH. 2019. Coverage-Versus-Length Plots, a Simple Quality Control Step for de Novo Yeast  
524 Genome Sequence Assemblies. *G3 Genes/Genomes/Genetics*, **9**: 879–887.

- 525 <https://academic.oup.com/g3journal/article/9/3/879/6026761>.
- 526 Fabre CE, Blanc PJ, Goma G. 1998. Production of 2-Phenylethyl Alcohol by *Kluyveromyces*  
527 *marxianus*. *Biotechnol. Prog.*, **14**: 270–274. <http://doi.wiley.com/10.1021/bp9701022>.
- 528 Gamero A, Quintilla R, Groenewald M, Alkema W, Boekhout T, Hazelwood L. 2016. High-  
529 throughput screening of a large collection of non-conventional yeasts reveals their potential for  
530 aroma formation in food fermentation. *Food Microbiol.*, **60**: 147–159.
- 531 Gernat DC, Brouwer E, Ottens M. 2020. Aldehydes as Wort Off-Flavours in Alcohol-Free Beers—  
532 Origin and Control. *Food Bioprocess Technol.*, **13**: 195–216.  
533 <http://link.springer.com/10.1007/s11947-019-02374-z>.
- 534 Gutiérrez A, Boekhout T, Gojkovic Z, Katz M. 2018. Evaluation of non- *Saccharomyces* yeasts in  
535 the fermentation of wine, beer and cider for the development of new beverages. *J. Inst. Brew.*,  
536 **124**: 389–402. <http://doi.wiley.com/10.1002/jib.512>.
- 537 Holt S, Mukherjee V, Lievens B, Verstrepen KJ, Thevelein JM. 2018. Bioflavoring by non-  
538 conventional yeasts in sequential beer fermentations. *Food Microbiol.*, **72**: 55–66.  
539 <https://linkinghub.elsevier.com/retrieve/pii/S0740002017303763>.
- 540 Hutzler M, Michel M, Kunz O, Kuusisto T, Magalhães F, Krogerus K, Gibson B. 2021. Unique  
541 Brewing-Relevant Properties of a Strain of *Saccharomyces jurei* Isolated From Ash (*Fraxinus*  
542 *excelsior*). *Front. Microbiol.*, **12**.  
543 <https://www.frontiersin.org/articles/10.3389/fmicb.2021.645271/full>.
- 544 Johansson L et al. 2021. Sourdough cultures as reservoirs of maltose-negative yeasts for low-  
545 alcohol beer brewing. *Food Microbiol.*, **94**: 103629.  
546 <https://linkinghub.elsevier.com/retrieve/pii/S0740002020302185>.
- 547 Katoh K, Standley DM. 2013. MAFFT Multiple Sequence Alignment Software Version 7:  
548 Improvements in Performance and Usability. *Mol. Biol. Evol.*, **30**: 772–780.  
549 <https://academic.oup.com/mbe/article-lookup/doi/10.1093/molbev/mst010>.
- 550 Katz L, Griswold T, Morrison S, Caravas J, Zhang S, Bakker H, Deng X, Carleton H. 2019.  
551 Mashtree: a rapid comparison of whole genome sequence files. *J. Open Source Softw.*, **4**: 1762.  
552 <https://joss.theoj.org/papers/10.21105/joss.01762>.
- 553 Kregiel D. 2015. Health Safety of Soft Drinks: Contents, Containers, and Microorganisms. *Biomed*  
554 *Res. Int.*, **2015**: 1–15. <http://www.hindawi.com/journals/bmri/2015/128697/>.
- 555 Krogerus K, Gibson B. 2020. A re-evaluation of diastatic *Saccharomyces cerevisiae* strains and  
556 their role in brewing. *Appl. Microbiol. Biotechnol.*, **104**: 3745–3756.  
557 <http://link.springer.com/10.1007/s00253-020-10531-0>.

- 558 Krogerus K, Gibson BR. 2013. 125th anniversary review: Diacetyl and its control during brewery  
559 fermentation. *J. Inst. Brew.*, **119**: 86–97.
- 560 Le S, Husson F. 2008. SENSOMINER: A PACKAGE FOR SENSORY DATA ANALYSIS. *J.*  
561 *Sens. Stud.*, **23**: 14–25. <http://doi.wiley.com/10.1111/j.1745-459X.2007.00137.x>.
- 562 Madden AA, Epps MJ, Fukami T, Irwin RE, Sheppard J, Sorger DM, Dunn RR. 2018. The ecology  
563 of insect–yeast relationships and its relevance to human industry. *Proc. R. Soc. B Biol. Sci.*,  
564 **285**: 20172733. <https://royalsocietypublishing.org/doi/10.1098/rspb.2017.2733>.
- 565 Menz G, Aldred P, Vriesekoop F. 2011. Growth and Survival of Foodborne Pathogens in Beer. *J.*  
566 *Food Prot.*, **74**: 1670–1675.
- 567 Mertens S, Steensels J, Gallone B, Souffriau B, Malcorps P, Verstrepen KJ. 2017. Rapid Screening  
568 Method for Phenolic Off-Flavor (POF) Production in Yeast. *J. Am. Soc. Brew. Chem.*, **75**:  
569 318–323. <https://www.tandfonline.com/doi/full/10.1094/ASBCJ-2017-4142-01>.
- 570 Methner Y, Hutzler M, Matoulková D, Jacob F, Michel M. 2019. Screening for the Brewing Ability  
571 of Different Non-Saccharomyces Yeasts. *Fermentation*, **5**: 101. [https://www.mdpi.com/2311-](https://www.mdpi.com/2311-5637/5/4/101)  
572 [5637/5/4/101](https://www.mdpi.com/2311-5637/5/4/101).
- 573 Michel M, Kopecká J, Meier-Dörnberg T, Zarnkow M, Jacob F, Hutzler M. 2016. Screening for  
574 new brewing yeasts in the non- Saccharomyces sector with *Torulaspora delbrueckii* as model.  
575 *Yeast*, **33**: 129–144. <http://doi.wiley.com/10.1002/yea.3146>.
- 576 Minh BQ, Nguyen MAT, Von Haeseler A. 2013. Ultrafast approximation for phylogenetic  
577 bootstrap. *Mol. Biol. Evol.*, **30**: 1188–1195.
- 578 Moreira N, Mendes F, Hogg T, Vasconcelos I. 2005. Alcohols, esters and heavy sulphur  
579 compounds production by pure and mixed cultures of apiculate wine yeasts. *Int. J. Food*  
580 *Microbiol.*, **103**: 285–294. <https://linkinghub.elsevier.com/retrieve/pii/S0168160505001054>.
- 581 Nguyen LT, Schmidt HA, Von Haeseler A, Minh BQ. 2015. IQ-TREE: A fast and effective  
582 stochastic algorithm for estimating maximum-likelihood phylogenies. *Mol. Biol. Evol.*, **32**:  
583 268–274.
- 584 Nikulin J, Vidgren V, Krogerus K, Magalhães F, Valkeemäki S, Kangas-Heiska T, Gibson B. 2020.  
585 Brewing potential of the wild yeast species *Saccharomyces paradoxus*. *Eur. Food Res.*  
586 *Technol.*, **246**: 2283–2297. <http://link.springer.com/10.1007/s00217-020-03572-2>.
- 587 Ondov BD, Treangen TJ, Melsted P, Mallonee AB, Bergman NH, Koren S, Phillippy AM. 2016.  
588 Mash: fast genome and metagenome distance estimation using MinHash. *Genome Biol.*, **17**:  
589 132. <https://genomebiology.biomedcentral.com/articles/10.1186/s13059-016-0997-x>.
- 590 Osburn K et al. 2018. Primary souring: A novel bacteria-free method for sour beer production. *Food*

- 591 *Microbiol.*, **70**: 76–84.
- 592 Perrin L, Pagès J. 2009. CONSTRUCTION OF A PRODUCT SPACE FROM THE ULTRA-  
593 FLASH PROFILING METHOD: APPLICATION TO 10 RED WINES FROM THE LOIRE  
594 VALLEY. *J. Sens. Stud.*, **24**: 372–395. [http://doi.wiley.com/10.1111/j.1745-](http://doi.wiley.com/10.1111/j.1745-459X.2009.00216.x)  
595 [459X.2009.00216.x](http://doi.wiley.com/10.1111/j.1745-459X.2009.00216.x).
- 596 Pires EJ, Teixeira JA, Brányik T, Vicente AA. 2014. Yeast: the soul of beer’s aroma—a review of  
597 flavour-active esters and higher alcohols produced by the brewing yeast. *Appl. Microbiol.*  
598 *Biotechnol.*, **98**: 1937–1949. <http://link.springer.com/10.1007/s00253-013-5470-0>.
- 599 Poveda JM. 2019. Biogenic amines and free amino acids in craft beers from the Spanish market: A  
600 statistical approach. *Food Control*, **96**: 227–233.  
601 <https://linkinghub.elsevier.com/retrieve/pii/S0956713518304651>.
- 602 Powell CD, Kerruish DWM. 2017. Beer-Spoiling Yeasts: Genomics, Detection, and Control. In  
603 *Brewing Microbiology: Current Research, Omics and Microbial Ecology*,. Caister Academic  
604 Press <http://www.caister.com/brewing>.
- 605 Risvik E, McEwan JA, Colwill JS, Rogers R, Lyon DH. 1994. Projective mapping: A tool for  
606 sensory analysis and consumer research. *Food Qual. Prefer.*, **5**: 263–269.  
607 <https://linkinghub.elsevier.com/retrieve/pii/0950329394900515>.
- 608 Rodriguez-Bencomo JJ, Muñoz-González C, Martín-Álvarez PJ, Lázaro E, Mancebo R, Castañé X,  
609 Pozo-Bayón MA. 2012. Optimization of a HS-SPME-GC-MS Procedure for Beer Volatile  
610 Profiling Using Response Surface Methodology: Application to Follow Aroma Stability of  
611 Beers Under Different Storage Conditions. *Food Anal. Methods*, **5**: 1386–1397.  
612 <http://link.springer.com/10.1007/s12161-012-9390-x>.
- 613 Saerens S, Swiegers J. 2013. Production of low-alcohol or alcohol-free beer with *Pichia kluyveri*  
614 yeast strains.
- 615 Schneider CA, Rasband WS, Eliceiri KW. 2012. NIH Image to ImageJ: 25 years of image analysis.  
616 *Nat. Methods*, **9**: 671–675. <http://www.nature.com/articles/nmeth.2089>.
- 617 Serra Colomer M, Funch B, Solodovnikova N, Hobbey TJ, Förster J. 2020. Biotransformation of  
618 hop derived compounds by *Brettanomyces* yeast strains. *J. Inst. Brew.*, **126**: 280–288.  
619 <http://doi.wiley.com/10.1002/jib.610>.
- 620 Shen XX et al. 2018. Tempo and Mode of Genome Evolution in the Budding Yeast Subphylum.  
621 *Cell*.
- 622 Shukla S, Rao TS. 2017. An Improved Crystal Violet Assay for Biofilm Quantification in 96-Well  
623 Microtitre Plate. *bioRxiv*.

- 624 Sohlberg E, Sarlin T, Juvonen R. 2021. Fungal diversity on brewery filling hall surfaces and quality  
625 control samples. *Yeast*. Submitted.
- 626 Spitaels F, Wieme AD, Janssens M, Aerts M, Daniel H-M, Van Landschoot A, De Vuyst L,  
627 Vandamme P. 2014. The Microbial Diversity of Traditional Spontaneously Fermented Lambic  
628 Beer Liles MR. (ed). *PLoS One*, **9**: e95384. <https://dx.plos.org/10.1371/journal.pone.0095384>.
- 629 Statista. 2021. Global market size of non-alcoholic beer 2016-2024.  
630 <https://www.statista.com/statistics/1091389/non-alcoholic-beer-market-size-worldwide/>.
- 631 Steenwyk JL, Shen X-X, Lind AL, Goldman GH, Rokas A. 2019. A Robust Phylogenomic Time  
632 Tree for Biotechnologically and Medically Important Fungi in the Genera *Aspergillus* and  
633 *Penicillium* Boyle JP. (ed). *MBio*, **10**. <https://journals.asm.org/doi/10.1128/mBio.00925-19>.
- 634 Takoi K, Itoga Y, Koie K, Kosugi T, Shimase M, Katayama Y, Nakayama Y, Watari J. 2010. The  
635 Contribution of Geraniol Metabolism to the Citrus Flavour of Beer: Synergy of Geraniol and  
636  $\beta$ -Citronellol Under Coexistence with Excess Linalool. *J. Inst. Brew.*, **116**: 251–260.  
637 <http://doi.wiley.com/10.1002/j.2050-0416.2010.tb00428.x>.
- 638 Tamang JP, Watanabe K, Holzapfel WH. 2016. Review: Diversity of Microorganisms in Global  
639 Fermented Foods and Beverages. *Front. Microbiol.*, **7**.  
640 <http://journal.frontiersin.org/article/10.3389/fmicb.2016.00377>.
- 641 Tubia I, Prasad K, Pérez-Lorenzo E, Abadín C, Zumárraga M, Oyanguren I, Barbero F, Paredes J,  
642 Arana S. 2018. Beverage spoilage yeast detection methods and control technologies: A review  
643 of *Brettanomyces*. *Int. J. Food Microbiol.*, **283**: 65–76.  
644 <https://linkinghub.elsevier.com/retrieve/pii/S0168160518303271>.
- 645 Waterhouse RM, Seppely M, Simão FA, Manni M, Ioannidis P, Klioutchnikov G, Kriventseva E V.,  
646 Zdobnov EM. 2018. BUSCO Applications from Quality Assessments to Gene Prediction and  
647 Phylogenomics. *Mol. Biol. Evol.*, **35**: 543–548.  
648 <https://academic.oup.com/mbe/article/35/3/543/4705839>.
- 649
- 650

651 Figure Legends

652

653 **Figure 1** - Phenotypic screening of 56 strains isolated from brewery environments. **(A)** The ability  
654 to grow on fructose, maltose and maltotriose as sole carbon sources. **(B)** The relationship between  
655 beer pH and alcohol by volume after wort fermentation with the 56 strains and three controls. The  
656 controls are marked with green, while the strains selected for further characterization are marked  
657 with red. **(C)** Principal component analysis of the results from the sniffing of beers produced with  
658 the 56 strains and three controls. Undesirable aromas are coloured red, while desirable aromas  
659 green. Points are coloured as in **(B)**. **(D)** The ability to decarboxylate ferulic acid (to 4-vinyl  
660 guaiacol) among the 56 strains and three controls as assessed by the decrease in absorbance at 320  
661 nm after growth in media supplemented with 100 mg/L ferulic acid.

662

663 **Figure 2** - **(A)** Concentrations of aldehydes in wort and beers ( $\mu\text{g/L}$ ). The dotted line indicates  
664 concentrations in a commercial pale lager beer. **(B)** Principal component analysis (PC1 vs PC2) of  
665 the concentrations of volatile aroma compounds detected in the wort and beers. **(C)** Heatmap of the  
666 concentrations of volatile aroma compounds detected in the wort and beers. The heatmap is  
667 coloured based on Z-scores of the concentrations for each compound (blue: negative Z-score, red:  
668 positive Z-scores).

669

670 **Figure 3** - Sensory analysis of beers made with selected isolates. Sensory analysis was performed  
671 using projective mapping based on **(A)** odour and **(B)** flavour. Experimental beers were compared  
672 to an unfermented wort sample and two replicates of a commercial full-strength lager beer.

673

674 **Figure 4** - Fermentation profiles and chemical analysis of beers produced at 30L-scale. **(A)** Alcohol  
675 by volume (%) in the fermenting wort. Concentrations of **(B)** linalool, **(C)** *cis*-geraniol, **(D)** *trans*-  
676 geraniol, **(E)** diacetyl, **(F)** dimethyl sulphide, **(G)** 3-methylbutanal, and **(H)** methional in the beers  
677 and wort. All values are the mean of two biological replicates. Error bars when present show  
678 standard deviation. **(C)** and **(D)** An asterisk indicates a significant difference ( $p < 0.05$ ) compared to  
679 the *S. ludwigii* reference strain as determined by an unpaired two-tailed t-test.

680

681 **Figure 5** - Descriptive flavour profiling of beers produced at 30L-scale. Sweetness is the only  
682 attribute with statistically significant difference ( $p < 0.05$ , marked with an asterisk) between  
683 samples in the two-way mixed model ANOVA.

684

685 **Figure 6** - Growth of **(A)** *T. cantarellii* P-69 and **(B)** *C. sojae* T-39 in the presence of common food  
686 preservatives. **(C)** Biofilm formation after cultivation in wort for 5 days. Different letters in the two  
687 series indicate significant differences ( $p < 0.05$ ) as determined by one-way ANOVA and Tukey's  
688 posthoc test.

689

690 **Figure 7** - **(A)** A maximum likelihood phylogenetic tree of *Trigonopsis cantarellii* P-69 (coloured  
691 red) and five closely related yeast species based on alignment of 996 BUSCO genes. Values at  
692 nodes represent bootstrap support. **(B)** A neighbour-joining tree generated based on MinHash  
693 distances in the assemblies of *Trigonopsis cantarellii* P-69 (coloured red) and five closely related  
694 yeast species.

695



696 Tables

697 **Table 1.** Alcohol by volume (%) and pH of beers produced with 7 brewery isolates and a *S.*  
698 *ludwigii* reference at lab-scale. Standard deviation in parenthesis.

| <b>Strain</b>                         | <b>Alcohol by volume (%)</b> | <b>pH</b>           |
|---------------------------------------|------------------------------|---------------------|
| <i>Wickerhamomyces anomalus</i> P-2.4 | 2.13 ( $\pm 0.03$ )          | 4.57 ( $\pm 0.08$ ) |
| <i>Pichia manshurica</i> P-5.2        | 0.04 ( $\pm 0.01$ )          | 4.61 ( $\pm 0.03$ ) |
| <i>Trigonopsis variabilis</i> P-5.8   | 0.02 ( $\pm 0.01$ )          | 4.78 ( $\pm 0.01$ ) |
| <i>Trigonopsis cantarellii</i> P-69   | 0.58 ( $\pm 0.04$ )          | 4.40 ( $\pm 0.03$ ) |
| <i>Kregervanrija delftensis</i> R-7   | 0.10 ( $\pm 0.01$ )          | 4.36 ( $\pm 0.01$ ) |
| <i>Meyerozyma caribbica</i> T-31      | 0.61 ( $\pm 0.01$ )          | 4.52 ( $\pm 0.04$ ) |
| <i>Candida sojae</i> T-39             | 0.50 ( $\pm 0.00$ )          | 4.66 ( $\pm 0.01$ ) |
| <i>Saccharomyces ludwigii</i> C181010 | 0.70 ( $\pm 0.00$ )          | 5.09 ( $\pm 0.02$ ) |

699

700

701 **Table 2.** Alcohol by volume (%) and pH of beers produced with 5 brewery isolates and a *S.*  
702 *ludwigii* reference at 2L-scale. Standard deviation in parenthesis.

| <b>Strain</b>                         | <b>Alcohol by volume (%)</b> | <b>pH</b>    |
|---------------------------------------|------------------------------|--------------|
| <i>Wickerhamomyces anomalus</i> P-2.4 | 0.60 (±0.00)                 | 4.64 (±0.01) |
| <i>Trigonopsis variabilis</i> P-5.8   | 0.02 (±0.02)                 | 4.54 (±0.42) |
| <i>Trigonopsis cantarellii</i> P-69   | 0.14 (±0.00)                 | 4.81 (±0.01) |
| <i>Kregervanrija delftensis</i> R-7   | 0.00 (±0.00)                 | 5.06 (±0.08) |
| <i>Candida sojae</i> T-39             | 0.22 (±0.01)                 | 4.72 (±0.03) |
| <i>Saccharomyces ludwigii</i> C181010 | 0.43 (±0.00)                 | 4.84 (±0.04) |

703

704

705 **Table 3.** Concentrations of higher alcohols and esters (mg/L) in the beers produced at 30L-scale.

| <b>Compound</b>      | <b><i>Saccharomyces<br/>ludwigii</i><br/>VTT-<br/>C181010</b> | <b><i>Trigonopsis<br/>cantarellii</i> P-69</b> | <b><i>Candida sojae</i> T-39</b> |
|----------------------|---------------------------------------------------------------|------------------------------------------------|----------------------------------|
| ethyl hexanoate      | <0.02                                                         | <0.02                                          | <0.02                            |
| ethyl octanoate      | <0.4                                                          | <0.4                                           | <0.4                             |
| ethyl decanoate      | <0.1                                                          | <0.1                                           | <0.1                             |
| ethyl dodecanoate    | <0.1                                                          | <0.1                                           | <0.1                             |
| phenyl ethyl acetate | <0.4                                                          | <0.4                                           | <0.4                             |
| phenyl alcohol       | 8.1                                                           | 0.75                                           | 1.85                             |
| acetaldehyde         | 4.9                                                           | 3.7                                            | 2.25                             |
| ethyl acetate        | 1.5                                                           | <0.59                                          | <0.59                            |
| iso-butyl acetate    | <0.06                                                         | <0.06                                          | <0.06                            |
| n-propanol           | 2.35                                                          | 3.4                                            | 1.95                             |
| iso-butanol          | 6.1                                                           | 2.3                                            | 7.2                              |
| iso-amyl acetate     | <0.14                                                         | <0.14                                          | <0.14                            |
| iso-amyl alcohol     | 14.65                                                         | 1.4                                            | 13.25                            |

706

707

708 **Table 4.** Minimum inhibitory concentrations (MIC) of nine antifungal compounds.

| <b>Antifungal compound</b> | <b><i>Trigonopsis cantarellii</i> P-69</b> | <b><i>Candida sojae</i> T-39</b> |
|----------------------------|--------------------------------------------|----------------------------------|
| Anidulafungin              | 0.12                                       | 0.25                             |
| Amphotericin B             | 0.12                                       | 0.5                              |
| Micafungin                 | 0.12                                       | 0.03                             |
| Caspofungin                | 0.12                                       | 0.06                             |
| 5-Flucytosine              | >64                                        | 0.25                             |
| Posaconazole               | 0.25                                       | 0.06                             |
| Voriconazole               | 0.015                                      | 0.03                             |
| Itraconazole               | 0.015                                      | 0.12                             |
| Fluconazole                | 1                                          | 1                                |

709

710

711 **Table 5.** Assembly statistics for *T. cantarellii* P-69.

|                                 |          |
|---------------------------------|----------|
| Genome size (bp)                | 11566117 |
| Contigs                         | 169      |
| Mean contig size (bp)           | 68438    |
| Median contig size (bp)         | 2365     |
| N50                             | 311069   |
| Largest contig size (bp)        | 1002201  |
| GC(%)                           | 42.88    |
| N count                         | 696      |
| N(%)                            | 0.01     |
| Total BUSCO groups searched     | 1711     |
| Complete BUSCOs                 | 960      |
| Complete and single-copy BUSCOs | 956      |
| Complete and duplicated BUSCOs  | 4        |
| Fragmented BUSCOs               | 188      |

712

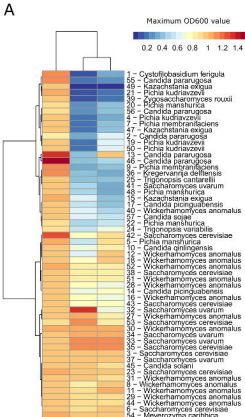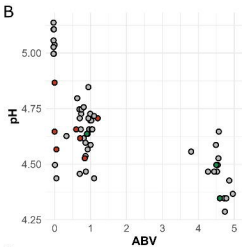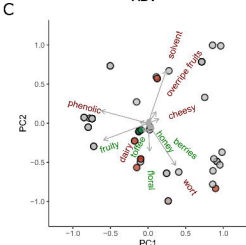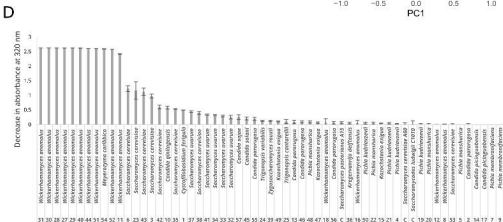





A

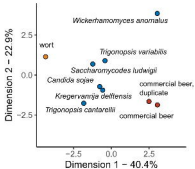

B

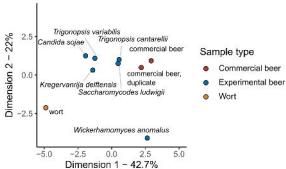

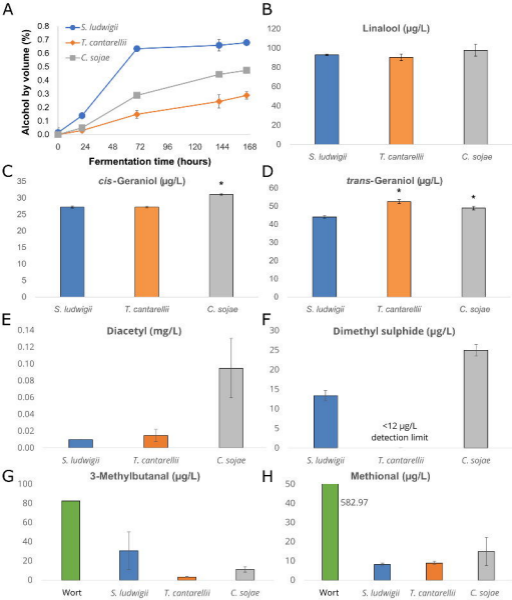

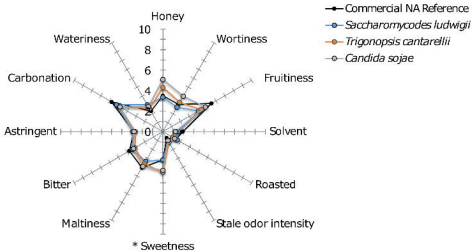

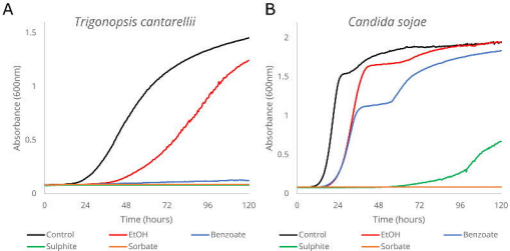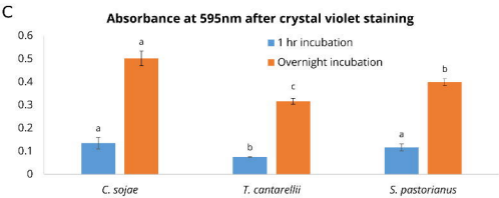

A

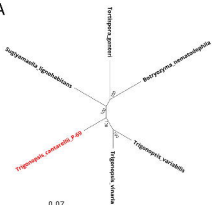

0.07

B

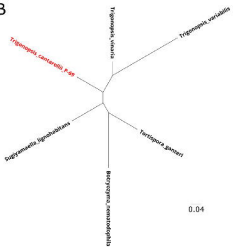

0.04
